# Supplementary material
Source: PubMed Central journal article supplement (PMC7984705)
Supplement: 15-01118.pdf [file 15-01118.pdf]

**On-line Table: Summary of the included studies**

| Author (yr)                              | NAPH           |                                                           |                                                                 |                       |                                         |                                                           | aSAH                                                            |                       |                                         |                                                           |                                                                 |                       |                                         |
|------------------------------------------|----------------|-----------------------------------------------------------|-----------------------------------------------------------------|-----------------------|-----------------------------------------|-----------------------------------------------------------|-----------------------------------------------------------------|-----------------------|-----------------------------------------|-----------------------------------------------------------|-----------------------------------------------------------------|-----------------------|-----------------------------------------|
|                                          | Total Patients | No. of Patients with Normal (Type A) Drainage Bilaterally | No. of Patients with Primitive Variant in at Least 1 Hemisphere | No. of Venous Systems | No. of Abnormal (Type C) Venous Systems | No. of Patients with Normal (Type A) Drainage Bilaterally | No. of Patients with Primitive Variant in at Least 1 Hemisphere | No. of Venous Systems | No. of Abnormal (Type C) Venous Systems | No. of Patients with Normal (Type A) Drainage Bilaterally | No. of Patients with Primitive Variant in at Least 1 Hemisphere | No. of Venous Systems | No. of Abnormal (Type C) Venous Systems |
| Daenekindt et al, 2008 <sup>37</sup>     | 118            | 59                                                        | 13                                                              | 28                    | 115                                     | 32                                                        | 59                                                              | 108                   | 27                                      | 10                                                        | 21                                                              | 108                   | 27                                      |
| Yamakawa et al, 2008 <sup>36</sup>       | 130            | 18                                                        | 2                                                               | 12                    | 35                                      | 18                                                        | 112                                                             | 195                   | 23                                      | 32                                                        | Unknown                                                         | 195                   | 23                                      |
| Buyukkaya et al, 2014 <sup>41</sup>      | 70             | 35                                                        | 14                                                              | 18                    | 70                                      | 24                                                        | 35                                                              | 70                    | 5                                       | 26                                                        | 4                                                               | 70                    | 5                                       |
| Song et al, 2010 <sup>39</sup>           | 114            | 57                                                        | 16                                                              | 28                    | 114                                     | 41                                                        | 57                                                              | 114                   | 13                                      | 34                                                        | 11                                                              | 114                   | 13                                      |
| Kawamura et al, 2011 <sup>37</sup>       | 48             | 13                                                        | 0                                                               | 7                     | 25                                      | 10                                                        | 35                                                              | 67                    | 7                                       | 14                                                        | 7                                                               | 67                    | 7                                       |
| Alén et al, 2008 <sup>40</sup>           | 203            | 91                                                        | 12                                                              | 38                    | 149                                     | 47                                                        | 112                                                             | 198                   | 31                                      | 54                                                        | 24                                                              | 198                   | 31                                      |
| Watanabe et al, 2002 <sup>33</sup>       | 108            | 6                                                         | 0                                                               | 6                     | 12                                      | 7                                                         | 102                                                             | 191                   | 42                                      | 22                                                        | Unknown                                                         | 191                   | 42                                      |
| van der Schaaf et al, 2004 <sup>38</sup> | 97             | 55                                                        | 4                                                               | 29                    | 110                                     | 41                                                        | 42                                                              | 84                    | 9                                       | 15                                                        | 8                                                               | 84                    | 9                                       |
| <b>Total</b>                             | <b>888</b>     | <b>334</b>                                                | <b>61 (18.3%)</b>                                               | <b>166 (49.7%)</b>    | <b>630</b>                              | <b>220 (34.9%)</b>                                        | <b>554</b>                                                      | <b>1027</b>           | <b>157 (15.3%)</b>                      | <b>207 (37.4%)</b>                                        | <b>75 (22.1%)</b>                                               | <b>1027</b>           | <b>157 (15.3%)</b>                      |

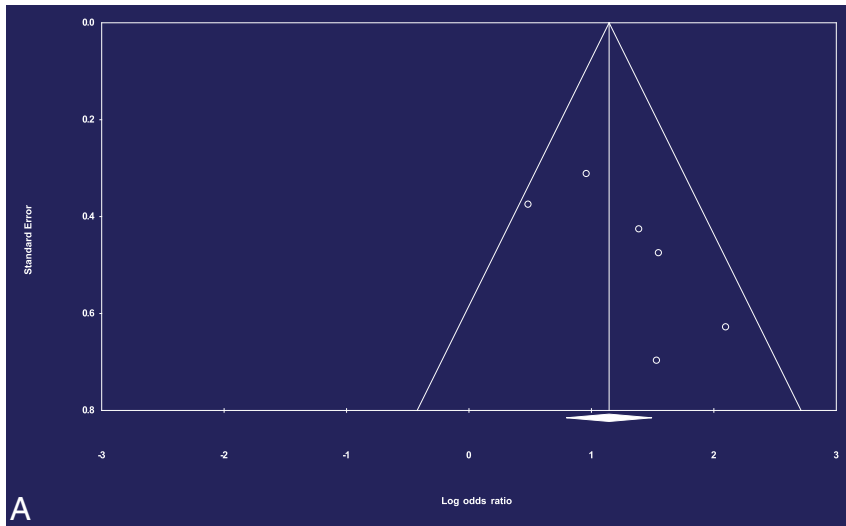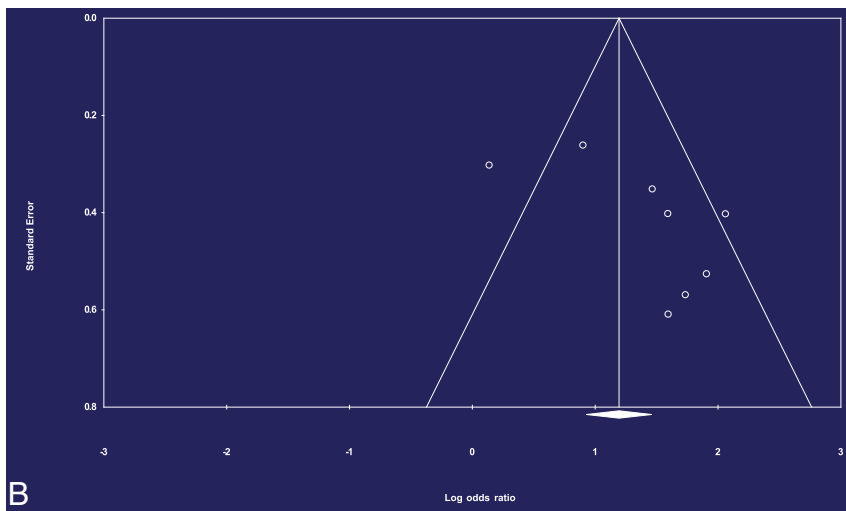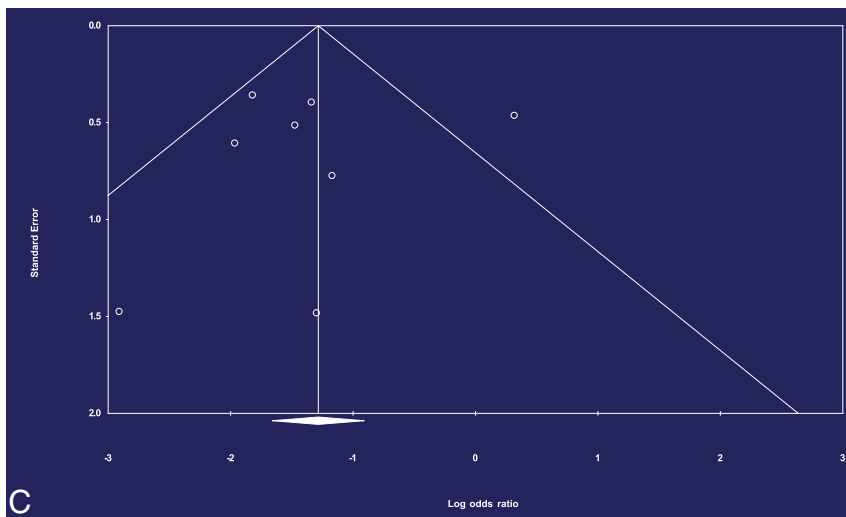

**ON-LINE FIG 1.** Funnel plot for publication bias. A, Funnel plot for the proportion of patients with at least 1 primitive BVR drainage ( $P$  value for the Egger test = .10). B, Funnel plot for the proportion of abnormal BVR drainage by venous system ( $P$  value for the Egger test = .07). C, Funnel plot for the proportion of patients with a normal bilateral BVR drainage pattern ( $P$  value for the Egger test = .78).
